# Supplementary material
Source: PubMed Central journal article supplement (PMC2579350)
Supplement: 0804525105_0804525105SI.pdf [file 0804525105_0804525105SI.pdf]

# Supporting Information

Caillat *et al.* 10.1073/pnas.0804525105

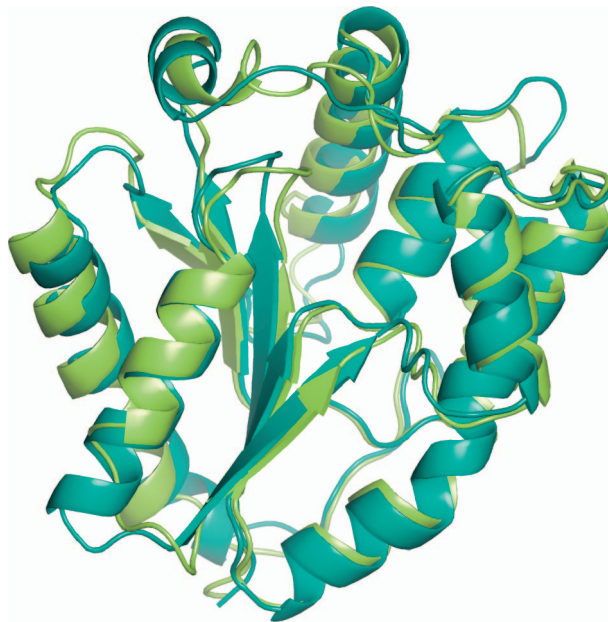

**Fig. S1.** Superimposition of the structures of the vaccinia virus and the human enzyme monomers in cartoon representation. The human enzyme is shown in cyan and the vaccinia virus monomer in green.

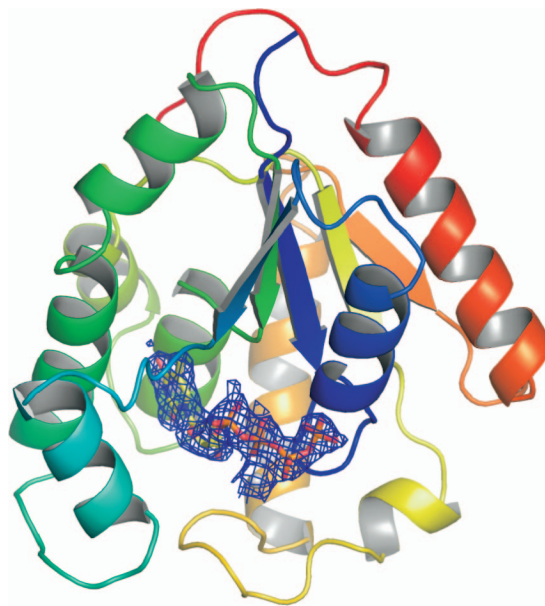

**Fig. S2.** The TDP and PPI (atom-type colored sticks) and a magnesium ion (gray sphere) are bound to the acceptor site of the vaccinia virus TMP kinase monomer B (rainbow-colored cartoon). The  $2F_{\text{obs}} - F_{\text{calc}}$  composite annealed omit map contoured at  $1\sigma$  is shown (blue mesh) around TDP, PPI, and  $\text{Mg}^{2+}$ .

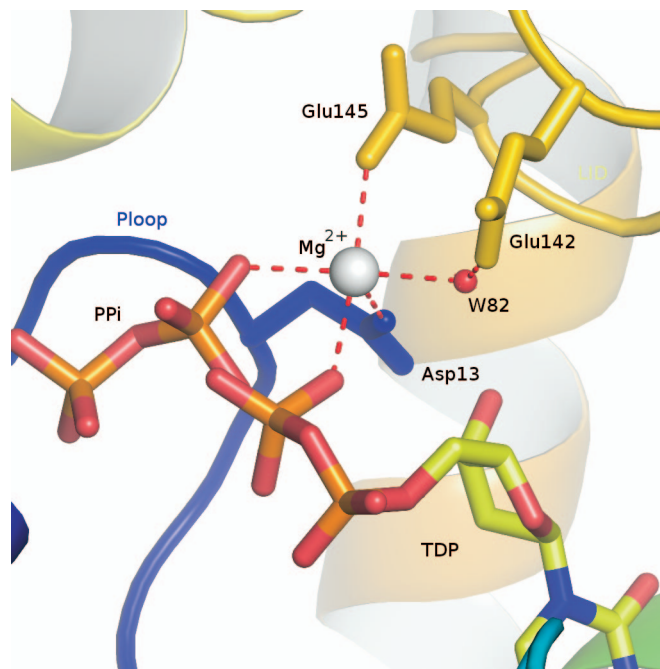

**Fig. S3.** The magnesium coordination is octahedral with a missing apical ligand. It involves oxygen atoms from the phosphates of TDP and PPI and the side-chain oxygen of Asp-14 in the P loop and Glu 154 from the LID. The fourth ligand is a water molecule held in place by Glu-142 from the LID. Magnesium was the only divalent cation present in millimolar amounts in the crystallization solution.

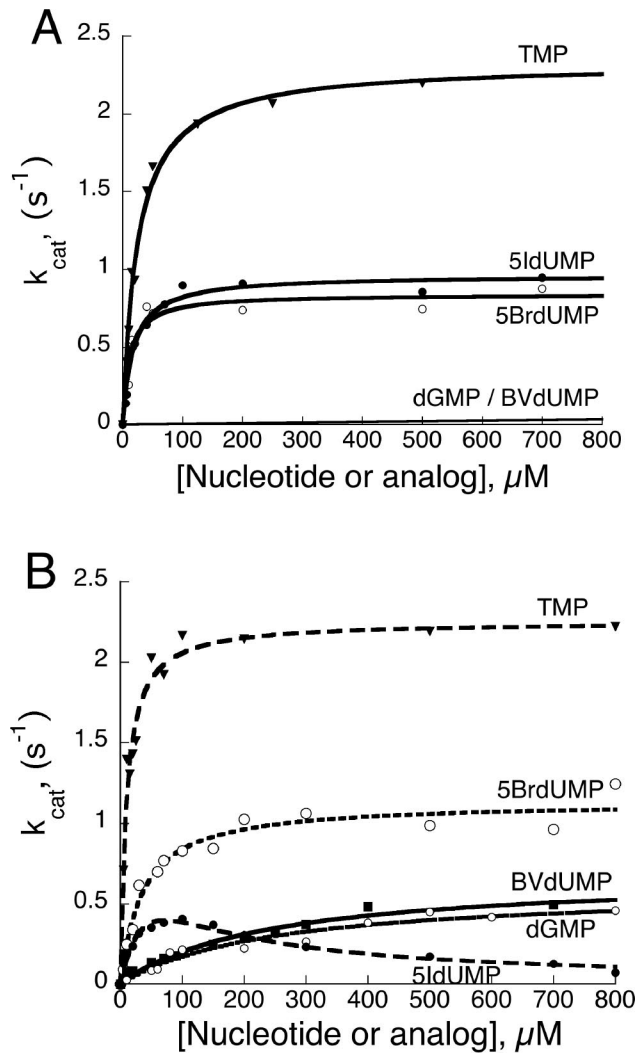

**Fig. S4.** Substrate specificity of vaccinia and human TMPKs. Saturation curves of hTMPK (A) and Vacc-TMPK (B) with TMP and analogs: TMP (filled inverted triangle), BVdU-MP (filled squares), dGMP (small open circles), 5-Br-dUMP (large open circles) and 5-I-dUMP (filled circles). Dashed curves are for published data [Topalis D, et al. (2005) Substrate specificity of vaccinia virus thymidylate kinase. *FEBS J* 272:6254–6265].

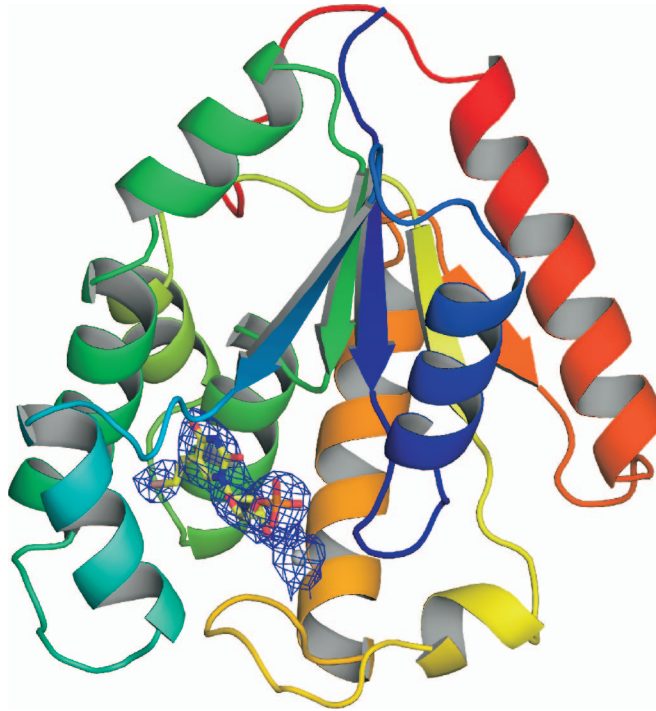

**Fig. S5.** The brivudin monophosphate (atom type colored sticks) and a magnesium ion (gray sphere) are bound to the acceptor site of the vaccinia virus TMP kinase monomer (rainbow-colored cartoon). The composite annealed omit map contoured at  $1 \sigma$  is shown (blue mesh) around BVdU-MP and  $Mg^{2+}$ .

Table S1. Data collection and refinement statistics

| Data collection                          | dTDP                                          | BVdU-MP                                       |
|------------------------------------------|-----------------------------------------------|-----------------------------------------------|
| Space group                              | P2 <sub>1</sub> 2 <sub>1</sub> 2 <sub>1</sub> | P2 <sub>1</sub> 2 <sub>1</sub> 2 <sub>1</sub> |
| Unit cell, Å                             |                                               |                                               |
| a                                        | 56.77                                         | 58.37                                         |
| b                                        | 55.59                                         | 78.35                                         |
| c                                        | 161.16                                        | 95.04                                         |
| Resolution, Å                            | 30–2.40                                       | 45–2.9                                        |
| Observed reflections                     | 79,520                                        | 69,977                                        |
| Unique reflections                       | 20,187                                        | 9,967                                         |
| Completeness (%)                         | 97.2 (93.6)*                                  | 99.4 (95.7)*                                  |
| $I/\sigma(I)$                            | 12.3 (2.25)                                   | 9.9 (2.3)                                     |
| $R_{\text{sym}}^{\dagger}$ , %           | 9.7 (59.2)                                    | 11.2 (52.4)                                   |
| Refinement statistics                    |                                               |                                               |
| $R_{\text{cryst}}^{\ddagger}$ , %        | 21.8                                          | 22.7                                          |
| $R_{\text{free}}^{\S}$ , %               | 27.9                                          | 29.1                                          |
| No. of water molecules                   | 107                                           | 6                                             |
| RMSD                                     |                                               |                                               |
| Bond lengths, Å                          | 0.0076                                        | 0.0088                                        |
| Bond angles, °                           | 1.4322                                        | 1.5519                                        |
| Ramachandran statistics <sup>¶</sup> , % |                                               |                                               |
| Most-favored regions                     | 87.8                                          | 89.1                                          |
| Additional allowed regions               | 12.1                                          | 10.7                                          |
| Disallowed regions                       | 0.1                                           | 0.2                                           |

\*Numbers in parentheses represent values in the highest-resolution shell (last of 10 shells).

<sup>†</sup> $R_{\text{sym}} = \sum_h \sum_i |I(h,i) - \langle I(h) \rangle| / \sum_h \sum_i I(h,i)$ , where  $I(h,i)$  is the intensity value of the  $i$ th measurement of  $h$  and  $\langle I(h) \rangle$  is the corresponding mean value of  $I(h)$  for all  $i$  measurements.

<sup>‡</sup> $R_{\text{cryst}} = \sum ||F_{\text{obs}}| - |F_{\text{calc}}|| / \sum |F_{\text{obs}}|$ , where  $|F_{\text{obs}}|$  and  $|F_{\text{calc}}|$  are the observed and calculated structure factor amplitudes, respectively.

<sup>§</sup> $R_{\text{free}}$  is the same as  $R_{\text{cryst}}$  but calculated with a 10% subset of all reflections that was never used in crystallographic refinement.

<sup>¶</sup>As evaluated by PROCHECK [Laskowski RA, *et al.* (1993) PROCHECK: A program to check the stereochemical quality of protein structures. *J Appl Crystallogr* 26:283–291].

**Table S2. Thermal denaturation monitored by microcalorimetry**

| TMP kinase | T <sub>m</sub> , °C | + Natural ligand 1 mM | + dGMP 1 mM | + BVdUMP 4 mM |
|------------|---------------------|-----------------------|-------------|---------------|
| Human TMPK | 52.2                | 59.9 (+TMP)           | 53.3        | 53.1          |
| Vacc-TMPk  | 42.5                | 47.4 (+TMP)           | 44.8        | 45.3          |
| HSV-TK     | 43.4*               | 52.6* (+T)            | –           | –             |

Conditions: 1.5 mg/ml; 50 mM Tris-HCl (pH7.4); denaturation between 10 °C and 80 °C.  
\*Data are from ref. 1

1. Wurth C, *et al.* (2001) The effect of substrate binding on the conformation and structural stability of Herpes simplex virus type 1 thymidine kinase. *Protein Sci* 10:63–73.
